# Supplementary material for: Plasticity-induced repression of Irf6 underlies acquired resistance to cancer immunotherapy in pancreatic ductal adenocarcinoma
Source: PubMed Central journal article supplement (PMC10879147; doi:10.1038/s41467-024-46048-7), 2024-02-20
Supplement: 41467_2024_46048_MOESM3_ESM.pdf [file 41467_2024_46048_MOESM3_ESM.pdf]

## Description of Additional Supplementary Information

**Title:** Supplementary Data 1

**Description:** Differentially expressed gene sets in *Zeb1/Snail* OE compared to EV. Genes with  $\log_2(\text{fold change}) > 1.5$  or  $< -1.5$  and adjusted p value  $< 0.01$  by RNA-seq analysis were listed.

**Title:** Supplementary Data 2

**Description:** *Irf6* signature gene sets. This signature was obtained from top ranked genes by a STAT value following the DESeq2 analysis of *Irf6* re-expressing Esc vs. EV Esc tumor cells.
